# Supplementary material
Source: PubMed Central journal article supplement (PMC6291210)
Supplement: NIHMS1511552-supplement-4.pdf [file NIHMS1511552-supplement-4.pdf]

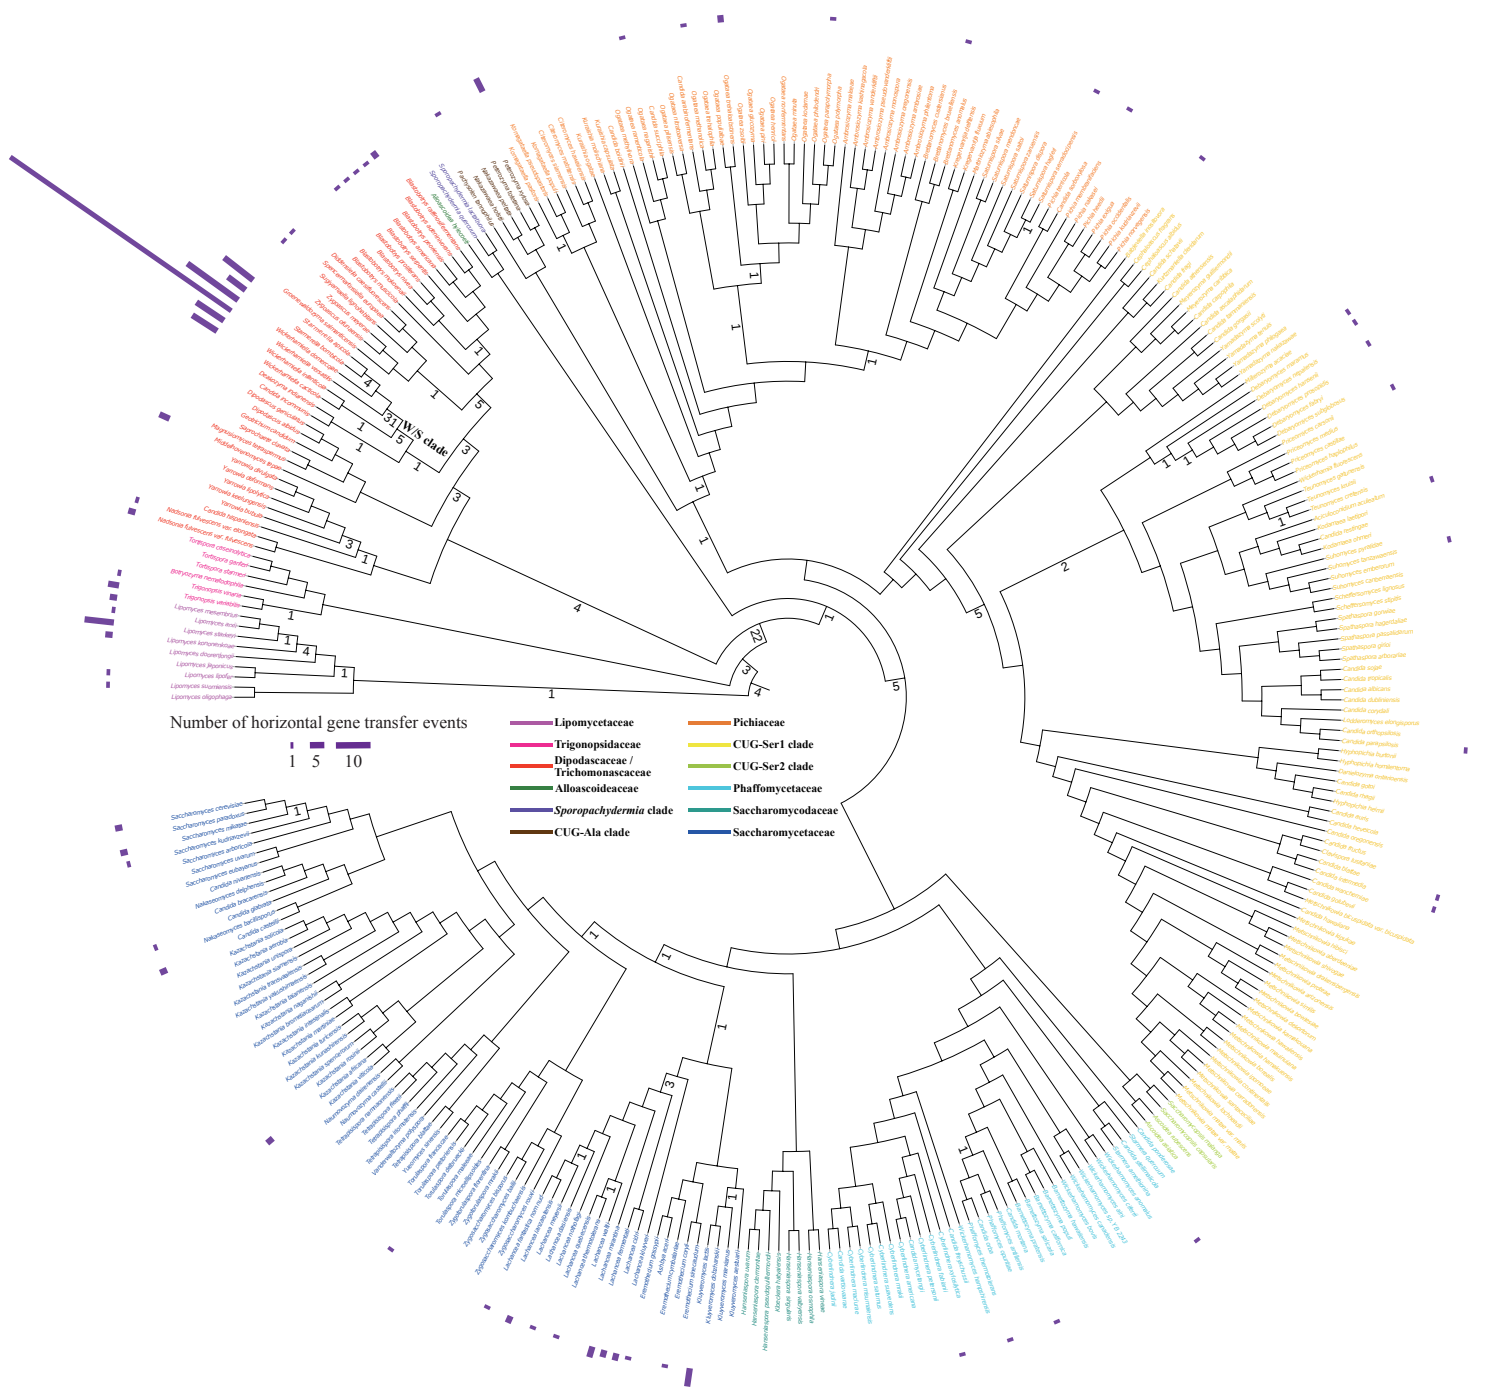

Number of horizontal gene transfer events

1 5 10

- Lipomycetaceae
- Pichiaceae
- Trigonopsidaceae
- CUG-Ser1 clade
- Dipodasceae / Trichomonasceae
- CUG-Ser2 clade
- Alloascoidaceae
- Phaffomycetaceae
- Sporopachydermia clade
- Saccharomycodaceae
- CUG-Ala clade
- Saccharomycetaceae
